# Supplementary material for: Inflammation Leads the Way on the ROADMAP to Diabetic Kidney Disease
Source: PubMed Central journal article supplement — Kidney Int Rep. 2019 Aug 20;4(10):1362–5. doi: 10.1016/j.ekir.2019.08.009 (PMC6829191; doi:10.1016/j.ekir.2019.08.009), 2019-08-20
Supplement: mmc1.pdf [file mmc1.pdf]

## Supplementary References

- S1. de Zeeuw D, Bekker P, Henkel E, et al. The effect of CCR2 inhibitor CCX140-B on residual albuminuria in patients with type 2 diabetes and nephropathy: a randomised trial. *Lancet Diabetes Endocrinol.* 2015;3:687–696.
- S2. Navarro-Gonzalez JF, Mora-Fernandez C, Muros de FM, et al. Effect of pentoxifylline on renal function and urinary albumin excretion in patients with diabetic kidney disease: the PREDIAN trial. *J Am Soc Nephrol.* 2015;26:220–229.
